# Supplementary material for: Potential bioavailability of representative pyrogenic organic matter compounds in comparison to natural dissolved organic matter pools
Source: Copernicus journal article supplement (doi:10.5194/bg-20-3449-2023), 2023-08-18
Supplement: Supplementary file 1 [file bg-20-3449-2023-supplement.zip]

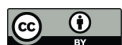

*Supplement of*

## **Potential bioavailability of representative pyrogenic organic matter compounds in comparison to natural dissolved organic matter pools**

**Emily B. Graham et al.**

*Correspondence to:* Emily B. Graham (emily.graham@pnnl.gov)

- [bg-20-3449-2023-supplement-title-page.pdf](#)
- [Graham et al Table S1-S4\\_revised.xlsx](#)
- [SI.pdf](#)

The copyright of individual parts of the supplement might differ from the article licence.
